# Supplementary material for: Comparative safety analysis of lacosamide and perampanel in epilepsy management: insights from FAERS database
Source: Front Pharmacol. 2024 Sep 19;15:1418609. doi: 10.3389/fphar.2024.1418609 (PMC11446851; doi:10.3389/fphar.2024.1418609)
Supplement: Supplementary file 2 [file Table1.xlsx]

## Sheet: Supplementary Table 1
soc	pt	lacosamide						perampanel
		Case Reports	ROR(95% CI)	PRR(95% CI)	chisq	IC(IC025)	EBGM(EBGM05)	Case Reports	ROR(95% CI)	PRR(95% CI)	chisq	IC(IC025)	EBGM(EBGM05)
psychiatric disorders	aggression	161	5.56(4.76, 6.49)	5.54(4.74, 6.48)	596.23	2.46(2.24)	5.52(4.84)	297	90.7(80.61, 102.06)	85.17(75.72, 95.8)	24465.3	6.4(6.23)	84.29(76.37)
psychiatric disorders	homicidal ideation	12	5.3(3, 9.34)	5.29(3, 9.34)	41.63	2.4(1.61)	5.28(3.28)	46	200.53(149.47, 269.04)	198.62(148.03, 266.51)	8828.92	7.6(7.18)	193.89(151.63)
psychiatric disorders	psychotic disorder	72	4.25(3.37, 5.36)	4.24(3.35, 5.36)	177.86	2.08(1.75)	4.23(3.49)	87	42.02(33.98, 51.98)	41.28(33.27, 51.21)	3403.86	5.36(5.06)	41.08(34.38)
psychiatric disorders	irritability	129	3.48(2.92, 4.13)	3.47(2.91, 4.14)	225.99	1.79(1.54)	3.46(2.99)	126	26.63(22.3, 31.79)	25.96(21.76, 30.97)	3016.66	4.69(4.44)	25.88(22.31)
psychiatric disorders	anger	85	4.1(3.31, 5.07)	4.09(3.3, 5.07)	197.98	2.03(1.72)	4.08(3.41)	78	30.12(24.07, 37.69)	29.65(23.9, 36.78)	2152.39	4.88(4.56)	29.54(24.49)
psychiatric disorders	suicide attempt							108	25.29(20.89, 30.61)	24.74(20.34, 30.1)	2455.3	4.62(4.35)	24.67(21.03)
psychiatric disorders	suicidal ideation							113	17.31(14.36, 20.87)	16.93(14.19, 20.2)	1692.64	4.08(3.81)	16.9(14.45)
psychiatric disorders	postictal psychosis	5	59.72(24.34, 146.52)	59.72(24.24, 147.12)	275.42	5.83(4.65)	57.02(26.91)	5	401.43(163.47, 985.79)	401.01(162.78, 987.9)	1900.97	8.58(7.39)	382.14(180.2)
psychiatric disorders	psychotic behaviour							9	112.37(58.17, 217.07)	112.16(57.6, 218.4)	977.99	6.79(5.89)	110.64(63.77)
psychiatric disorders	acute psychosis	12	8.22(4.66, 14.51)	8.22(4.66, 14.51)	75.62	3.03(2.24)	8.17(5.08)	14	74.24(43.83, 125.74)	74.02(43.6, 125.65)	999.44	6.2(5.46)	73.36(47.2)
psychiatric disorders	hostility							12	74.22(42.01, 131.11)	74.03(41.93, 130.7)	856.76	6.2(5.41)	73.37(45.58)
psychiatric disorders	persecutory delusion	12	8.48(4.8, 14.96)	8.47(4.8, 14.95)	78.57	3.07(2.29)	8.42(5.24)	12	65.97(37.36, 116.52)	65.81(37.28, 116.18)	759.79	6.03(5.24)	65.29(40.57)
psychiatric disorders	abnormal behaviour	118	5.07(4.23, 6.08)	5.06(4.24, 6.04)	383.12	2.33(2.07)	5.04(4.33)	48	17.26(12.99, 22.94)	17.1(13, 22.5)	726.46	4.09(3.69)	17.07(13.45)
psychiatric disorders	delusional perception							3	94.62(30.3, 295.41)	94.56(30.34, 294.72)	274.5	6.55(5.12)	93.48(36.06)
psychiatric disorders	agitation							76	13.98(11.14, 17.54)	13.77(11.1, 17.08)	899.78	3.78(3.46)	13.75(11.37)
psychiatric disorders	personality change							14	19.78(11.7, 33.44)	19.72(11.62, 33.48)	248.26	4.3(3.57)	19.68(12.68)
psychiatric disorders	violence-related symptom							4	35.56(13.31, 94.98)	35.53(13.33, 94.67)	133.64	5.14(3.88)	35.38(15.55)
psychiatric disorders	hallucination, auditory							19	16.21(10.32, 25.44)	16.15(10.29, 25.35)	269.49	4.01(3.38)	16.12(11.05)
psychiatric disorders	impulsive behaviour							6	21.68(9.73, 48.34)	21.66(9.7, 48.38)	117.92	4.43(3.36)	21.6(11.05)
psychiatric disorders	psychiatric symptom							11	18.23(10.08, 32.97)	18.19(10.1, 32.75)	178.34	4.18(3.36)	18.15(11.06)
psychiatric disorders	behaviour disorder	33	12.16(8.63, 17.13)	12.15(8.71, 16.95)	334.37	3.59(3.1)	12.04(9.04)	8	19.1(9.54, 38.24)	19.07(9.6, 37.87)	136.63	4.25(3.3)	19.02(10.64)

## Sheet: Supplementary Table 2
soc	pt	lacosamide						perampanel
		Case Reports	ROR(95% CI)	PRR(95% CI)	chisq	IC(IC025)	EBGM(EBGM05)	Case Reports	ROR(95% CI)	PRR(95% CI)	chisq	IC(IC025)	EBGM(EBGM05)
nervous system disorders	drug withdrawal convulsions	14	12.22(7.22, 20.7)	12.22(7.2, 20.74)	142.83	3.6(2.86)	12.11(7.8)	16	98.29(59.99, 161.04)	97.96(60.01, 159.9)	1517.3	6.6(5.91)	96.81(64.04)
nervous system disorders	psychomotor hyperactivity							12	9.19(5.21, 16.19)	9.17(5.19, 16.19)	87.23	3.19(2.41)	9.16(5.7)
nervous system disorders	hypotonia							6	8.03(3.61, 17.89)	8.02(3.59, 17.91)	36.85	3(1.93)	8.02(4.1)
nervous system disorders	somnolence	405	3.4(3.08, 3.75)	3.37(3.06, 3.72)	676.1	1.75(1.61)	3.37(3.1)	115	7.24(6.02, 8.72)	7.1(5.95, 8.47)	603.68	2.83(2.56)	7.09(6.07)
nervous system disorders	coordination abnormal							7	7.21(3.43, 15.13)	7.2(3.42, 15.16)	37.33	2.85(1.85)	7.19(3.87)
nervous system disorders	sedation							13	6.85(3.98, 11.82)	6.84(3.95, 11.84)	64.78	2.77(2.02)	6.83(4.33)
nervous system disorders	encephalopathy	60	4.25(3.3, 5.48)	4.25(3.29, 5.48)	148.43	2.08(1.72)	4.23(3.42)	12	6.42(3.64, 11.31)	6.41(3.63, 11.32)	54.72	2.68(1.89)	6.4(3.98)
nervous system disorders	drooling							3	5.77(1.86, 17.91)	5.77(1.85, 17.98)	11.82	2.53(1.11)	5.77(2.24)
nervous system disorders	myoclonus	53	7.77(5.93, 10.18)	7.76(5.9, 10.21)	310.34	2.95(2.56)	7.72(6.16)	5	5.67(2.36, 13.63)	5.66(2.34, 13.67)	19.18	2.5(1.34)	5.66(2.72)
nervous system disorders	cognitive disorder	96	3.29(2.7, 4.03)	3.29(2.7, 4)	152.62	1.71(1.43)	3.28(2.78)	22	5.56(3.65, 8.45)	5.54(3.67, 8.36)	81.77	2.47(1.88)	5.53(3.9)
nervous system disorders	balance disorder	213	3.91(3.41, 4.47)	3.89(3.39, 4.46)	456.42	1.96(1.76)	3.88(3.47)	36	4.94(3.56, 6.86)	4.91(3.52, 6.85)	112.22	2.3(1.83)	4.91(3.73)
nervous system disorders	ataxia	62	8.18(6.37, 10.5)	8.17(6.33, 10.54)	387.55	3.02(2.66)	8.12(6.59)	38	39.93(28.99, 54.99)	39.62(28.95, 54.21)	1423.88	5.3(4.85)	39.43(30.17)
nervous system disorders	dizziness	676	2.28(2.11, 2.46)	2.26(2.09, 2.44)	475.37	1.17(1.06)	2.25(2.11)	152	3.85(3.28, 4.53)	3.76(3.21, 4.4)	310.88	1.91(1.68)	3.76(3.29)
nervous system disorders	aphasia	79	4.22(3.38, 5.27)	4.21(3.39, 5.22)	193.09	2.07(1.75)	4.2(3.49)	9	3.68(1.91, 7.08)	3.68(1.93, 7.03)	17.53	1.88(0.98)	3.67(2.13)
nervous system disorders	disturbance in attention							16	3.65(2.23, 5.96)	3.64(2.23, 5.94)	30.64	1.86(1.18)	3.64(2.41)
nervous system disorders	coma							13	3.65(2.12, 6.29)	3.64(2.1, 6.3)	24.91	1.86(1.11)	3.64(2.31)
nervous system disorders	depressed level of consciousness							10	3.54(1.9, 6.59)	3.54(1.89, 6.63)	18.21	1.82(0.97)	3.54(2.1)
nervous system disorders	altered state of consciousness	54	4.17(3.19, 5.45)	4.17(3.17, 5.49)	129.59	2.06(1.67)	4.16(3.32)	35	20.69(14.83, 28.87)	20.55(14.73, 28.68)	649.5	4.36(3.88)	20.5(15.52)
nervous system disorders	cerebellar syndrome							3	18.58(5.98, 57.69)	18.56(5.95, 57.85)	49.74	4.21(2.79)	18.52(7.18)
nervous system disorders	slow speech							4	18.36(6.88, 49)	18.35(6.89, 48.89)	65.46	4.19(2.93)	18.31(8.05)
nervous system disorders	language disorder							3	13.45(4.33, 41.75)	13.44(4.31, 41.89)	34.49	3.75(2.33)	13.42(5.2)
nervous system disorders	psychomotor skills impaired							3	12.84(4.14, 39.88)	12.84(4.12, 40.02)	32.7	3.68(2.26)	12.82(4.97)
nervous system disorders	drop attacks	14	36.62(21.52, 62.32)	36.61(21.57, 62.15)	471.03	5.15(4.41)	35.59(22.81)	6	118.4(52.86, 265.22)	118.25(52.94, 264.12)	687.55	6.87(5.79)	116.57(59.36)
nervous system disorders	dysarthria							32	11.32(8, 16.03)	11.25(7.91, 16.01)	298.7	3.49(3)	11.24(8.4)

## Sheet: Supplementary Table 3
soc	pt	lacosamide						perampanel
		Case Reports	ROR(95% CI)	PRR(95% CI)	chisq	IC(IC025)	EBGM(EBGM05)	Case Reports	ROR(95% CI)	PRR(95% CI)	chisq	IC(IC025)	EBGM(EBGM05)
general disorders and administration site conditions	sudden unexplained death in epilepsy	47	145.05(107.21, 196.25)	144.86(107.96, 194.37)	6013.39	7.02(6.59)	129.83(100.82)	16	355.29(215.2, 586.6)	354.12(216.94, 578.04)	5398	8.41(7.7)	339.33(223.06)
general disorders and administration site conditions	drowning	6	10.35(4.64, 23.12)	10.35(4.63, 23.12)	50.27	3.36(2.29)	10.27(5.24)	4	54.32(20.31, 145.26)	54.27(20.37, 144.6)	207.78	5.75(4.48)	53.92(23.67)
general disorders and administration site conditions	screaming							7	15.69(7.47, 32.94)	15.66(7.44, 32.98)	95.92	3.97(2.97)	15.64(8.4)
general disorders and administration site conditions	multiple-drug resistance	135	86.14(72.33, 102.59)	85.81(71.93, 102.36)	10585.6	6.33(6.08)	80.33(69.41)	4	16.01(6, 42.7)	15.99(6, 42.6)	56.11	4(2.73)	15.96(7.02)
general disorders and administration site conditions	feeling drunk	31	6.79(4.77, 9.66)	6.78(4.76, 9.65)	152.05	2.76(2.25)	6.75(5.02)	7	11.96(5.7, 25.12)	11.95(5.67, 25.17)	70.12	3.58(2.58)	11.93(6.41)
general disorders and administration site conditions	hypothermia							8	10.19(5.09, 20.39)	10.17(5.12, 20.2)	66.09	3.34(2.4)	10.16(5.68)
general disorders and administration site conditions	drug interaction							54	4.39(3.35, 5.73)	4.35(3.31, 5.72)	139.46	2.12(1.74)	4.35(3.47)
general disorders and administration site conditions	gait disturbance							60	3.61(2.8, 4.65)	3.57(2.77, 4.61)	111.55	1.84(1.47)	3.57(2.89)
general disorders and administration site conditions	drug ineffective for unapproved indication	114	3.49(2.9, 4.2)	3.48(2.92, 4.15)	201.32	1.8(1.53)	3.48(2.98)
nervous system disorders	cognitive disorder	96	3.29(2.7, 4.03)	3.29(2.7, 4)	152.62	1.71(1.43)	3.28(2.78)	22	5.56(3.65, 8.45)	5.54(3.67, 8.36)	81.77	2.47(1.88)	5.53(3.9)
nervous system disorders	balance disorder	213	3.91(3.41, 4.47)	3.89(3.39, 4.46)	456.42	1.96(1.76)	3.88(3.47)	36	4.94(3.56, 6.86)	4.91(3.52, 6.85)	112.22	2.3(1.83)	4.91(3.73)
nervous system disorders	ataxia	62	8.18(6.37, 10.5)	8.17(6.33, 10.54)	387.55	3.02(2.66)	8.12(6.59)	38	39.93(28.99, 54.99)	39.62(28.95, 54.21)	1423.88	5.3(4.85)	39.43(30.17)
nervous system disorders	dizziness	676	2.28(2.11, 2.46)	2.26(2.09, 2.44)	475.37	1.17(1.06)	2.25(2.11)	152	3.85(3.28, 4.53)	3.76(3.21, 4.4)	310.88	1.91(1.68)	3.76(3.29)
nervous system disorders	aphasia	79	4.22(3.38, 5.27)	4.21(3.39, 5.22)	193.09	2.07(1.75)	4.2(3.49)	9	3.68(1.91, 7.08)	3.68(1.93, 7.03)	17.53	1.88(0.98)	3.67(2.13)
nervous system disorders	disturbance in attention							16	3.65(2.23, 5.96)	3.64(2.23, 5.94)	30.64	1.86(1.18)	3.64(2.41)
nervous system disorders	coma							13	3.65(2.12, 6.29)	3.64(2.1, 6.3)	24.91	1.86(1.11)	3.64(2.31)
nervous system disorders	depressed level of consciousness							10	3.54(1.9, 6.59)	3.54(1.89, 6.63)	18.21	1.82(0.97)	3.54(2.1)
nervous system disorders	altered state of consciousness	54	4.17(3.19, 5.45)	4.17(3.17, 5.49)	129.59	2.06(1.67)	4.16(3.32)	35	20.69(14.83, 28.87)	20.55(14.73, 28.68)	649.5	4.36(3.88)	20.5(15.52)
nervous system disorders	cerebellar syndrome							3	18.58(5.98, 57.69)	18.56(5.95, 57.85)	49.74	4.21(2.79)	18.52(7.18)
nervous system disorders	slow speech							4	18.36(6.88, 49)	18.35(6.89, 48.89)	65.46	4.19(2.93)	18.31(8.05)
nervous system disorders	language disorder							3	13.45(4.33, 41.75)	13.44(4.31, 41.89)	34.49	3.75(2.33)	13.42(5.2)
nervous system disorders	psychomotor skills impaired							3	12.84(4.14, 39.88)	12.84(4.12, 40.02)	32.7	3.68(2.26)	12.82(4.97)
nervous system disorders	drop attacks	14	36.62(21.52, 62.32)	36.61(21.57, 62.15)	471.03	5.15(4.41)	35.59(22.81)	6	118.4(52.86, 265.22)	118.25(52.94, 264.12)	687.55	6.87(5.79)	116.57(59.36)
nervous system disorders	dysarthria							32	11.32(8, 16.03)	11.25(7.91, 16.01)	298.7	3.49(3)	11.24(8.4)
